# Supplementary material for: Organic soil amendments using vermicomposts under inoculation of N2-fixing bacteria for sustainable rice production
Source: PeerJ. 2021 Sep 2;9:e10833. doi: 10.7717/peerj.10833 (PMC8418801; doi:10.7717/peerj.10833)
Supplement: Supplemental Information 1 [file peerj-09-10833-s001.xlsx]

## Sheet: Data
	Y	R	B	M	X1	Y	R	C	M	X2	X3	X4	X5	X6					X7					X8					X9					X10	X11	X12	X13	X14
	Year	Rep	Bacteria	Organic amendment	SOIL BACTERIA accont	Year	Rep	Bacteria	Organic amendment	Microbial biomass–C	chlorophyll a	chlorophyll b	chlorophyll a+b	plant height	Year	Rep	Bacteria	Organic amendment	panicle length	year	Rep	Bacteria	Organic amendment	No.tiller hill	year	Rep	Bacteria	Organic amendment	grain yield	year	Rep	Bacteria	Organic amendment	Biological yield	P leaf	K leaf	P uptake	K uptake
	1	1	1	1	170	1	1	1	1	230.9	2.17	0.49	2.66	108	1	1	1	1	25.28	1	1	1	1	12	1	1	1	1	2629	1	1	1	1	5986	0.375	0.76	22.4475	45.4936
	1	2	1	1	140	1	2	1	1	233	1.33	0.32	1.65	112.1	1	2	1	1	30.83	1	2	1	1	13	1	2	1	1	2757	1	2	1	1	5486	0.326923	0.33	17.935	18.1038
	1	3	1	1	200	1	3	1	1	226	2.23	0.53	2.76	110.42	1	3	1	1	27.78	1	3	1	1	12	1	3	1	1	2686	1	3	1	1	5971	0.259615	0.34	15.5016	20.3014
	1	1	1	2	200	1	1	1	2	328.4	3.42	0.78	4.2	128.78	1	1	1	2	44.72	1	1	1	2	15	1	1	1	2	2886	1	1	1	2	7014	0.298077	0.56	20.9071	39.2784
	1	2	1	2	320	1	2	1	2	320	2.17	0.79	2.96	129.66	1	2	1	2	38.28	1	2	1	2	15.7	1	2	1	2	2829	1	2	1	2	7000	0.259615	0.53	18.1731	37.1
	1	3	1	2	330	1	3	1	2	322	2.87	0.98	3.85	129.82	1	3	1	2	46.67	1	3	1	2	16	1	3	1	2	2857	1	3	1	2	7271	0.336538	0.42	24.4697	30.5382
	1	1	1	3	190	1	1	1	3	337.8	4.36	0.89	5.25	126.8	1	1	1	3	34.44	1	1	1	3	20	1	1	1	3	3114	1	1	1	3	7214	0.317308	0.52	22.8906	37.5128
	1	2	1	3	220	1	2	1	3	345	3.01	0.96	3.97	125.2	1	2	1	3	40.14	1	2	1	3	18	1	2	1	3	3071	1	2	1	3	7271	0.394231	0.41	28.6645	29.8111
	1	3	1	3	210	1	3	1	3	332	3.11	1.06	4.17	128.38	1	3	1	3	24.44	1	3	1	3	18	1	3	1	3	3100	1	3	1	3	7000	0.307692	0.6	21.5385	42
	1	1	1	4	290	1	1	1	4	331.7	4.37	1.02	5.39	122.16	1	1	1	4	38.19	1	1	1	4	18	1	1	1	4	2986	1	1	1	4	6586	0.567308	0.49	37.3629	32.2714
	1	2	1	4	320	1	2	1	4	328	3.33	0.95	4.28	129	1	2	1	4	34.86	1	2	1	4	19	1	2	1	4	2786	1	2	1	4	7329	0.394231	0.55	28.8932	40.3095
	1	3	1	4	190	1	3	1	4	330	3.31	1.39	4.7	127.72	1	3	1	4	48.06	1	3	1	4	17	1	3	1	4	2871	1	3	1	4	7457	0.403846	0.32	30.1148	23.8624
	1	1	1	5	410	1	1	1	5	356	3.53	0.79	4.32	126.96	1	1	1	5	32.83	1	1	1	5	18.9	1	1	1	5	3786	1	1	1	5	9443	0.278846	0.59	26.3314	55.7137
	1	2	1	5	400	1	2	1	5	358	2.27	0.67	2.94	119.76	1	2	1	5	31.25	1	2	1	5	19	1	2	1	5	3500	1	2	1	5	9114	0.307692	0.85	28.0431	77.469
	1	3	1	5	320	1	3	1	5	356.6	2.17	0.66	2.83	131.36	1	3	1	5	24.78	1	3	1	5	20	1	3	1	5	3500	1	3	1	5	9071	0.365385	0.95	33.144	86.1745
	1	1	1	6	190	1	1	1	6	358	4.83	0.85	5.68	134.02	1	1	1	6	21.14	1	1	1	6	18.7	1	1	1	6	3493	1	1	1	6	7129	0.394231	0.26	28.1047	18.5354
	1	2	1	6	370	1	2	1	6	334	2.83	0.81	3.64	127.58	1	2	1	6	28.53	1	2	1	6	19.2	1	2	1	6	3484	1	2	1	6	7657	0.442308	0.41	33.8675	31.3937
	1	3	1	6	320	1	3	1	6	343.4	3.01	1.32	4.33	132.42	1	3	1	6	38.89	1	3	1	6	19.11	1	3	1	6	3501	1	3	1	6	7686	0.375	0.42	28.8225	32.2812
	1	1	2	1	220	1	1	2	1	212	4.91	0.77	6.68	128.66	1	1	2	1	25.28	1	1	2	1	16.15	1	1	2	1	2717	1	1	2	1	6657	0.461538	0.25	30.7246	16.6425
	1	2	2	1	290	1	2	2	1	226	3.37	0.95	4.28	122.2	1	2	2	1	26.25	1	2	2	1	16.3	1	2	2	1	3030	1	2	2	1	7914	0.394231	0.29	31.1994	22.9506
	1	3	2	1	260	1	3	2	1	226	3	0.78	4.74	135.98	1	3	2	1	25.28	1	3	2	1	16.25	1	3	2	1	3210	1	3	2	1	8929	0.278846	0.41	24.8982	36.6089
	1	1	2	2	260	1	1	2	2	334	6.24	0.85	8	140.68	1	1	2	2	31.53	1	1	2	2	16.5	1	1	2	2	3517	1	1	2	2	8329	0.634615	0.52	52.8571	43.3108
	1	2	2	2	320	1	2	2	2	332	3.85	1.05	5.96	129.32	1	1	2	2	37.9	1	2	2	2	16.4	1	2	2	2	3419	1	2	2	2	8529	0.403846	0.91	34.444	77.6139
	1	3	2	2	350	1	3	2	2	337	3.71	1.27	5.75	134.62	1	2	2	2	30.28	1	3	2	2	17	1	3	2	2	3488	1	3	2	2	8286	0.442308	0.29	36.6496	24.0294
	1	1	2	3	310	1	1	2	3	330	7.45	1.35	5.39	130.22	1	2	2	2	40.59	1	1	2	3	20	1	1	2	3	3586	1	1	2	3	10229	0.471154	0.39	48.1943	39.8931
	1	2	2	3	290	1	2	2	3	338	4.03	1.25	3.99	133.38	1	3	2	2	27.08	1	2	2	3	21	1	2	2	3	3814	1	2	2	3	9386	0.394231	0.32	37.0025	30.0352
	1	3	2	3	360	1	3	2	3	330.8	4.54	1.49	3.8	132.5	1	3	2	2	38.69	1	3	2	3	19	1	3	2	3	3671	1	3	2	3	10057	0.413462	0.42	41.5818	42.2394
	1	1	2	4	210	1	1	2	4	352	8.67	2.12	6.81	141.17	1	1	2	4	37.56	1	1	2	4	17	1	1	2	4	3414	1	1	2	4	9100	0.384615	0.59	35	53.69
	1	2	2	4	320	1	2	2	4	348	6	2.2	5.24	138.22	1	2	2	4	34.26	1	2	2	4	18	1	2	2	4	3300	1	2	2	4	9186	0.384615	0.41	35.3308	37.6626
	1	3	2	4	370	1	3	2	4	348	4.73	2.4	4.78	134.38	1	3	2	4	30.21	1	3	2	4	19	1	3	2	4	3571	1	3	2	4	8857	0.442308	0.38	39.1752	33.6566
	1	1	2	5	420	1	1	2	5	358	6.08722	2.94	9.57	155.24	1	1	2	5	26.94	1	1	2	5	22.1	1	1	2	5	4659	1	1	2	5	10200	0.490385	0.51	50.0192	52.02
	1	2	2	5	490	1	2	2	5	340	6.21089	3.08	7.14	136.1	1	2	2	5	40.9	1	2	2	5	23	1	2	2	5	4686	1	2	2	5	11700	0.634615	0.27	74.25	31.59
	1	3	2	5	320	1	3	2	5	354	6.33456	3.22	5.78	139.36	1	3	2	5	38.99	1	3	2	5	22	1	3	2	5	4667	1	3	2	5	10600	0.403846	0.29	42.8077	30.74
	1	1	2	6	360	1	1	2	6	362	6.45822	2.52	9.45	133.92	1	1	2	6	26.94	1	1	2	6	21.3	1	1	2	6	4230	1	1	2	6	10586	0.403846	0.92	42.7512	97.3912
	1	2	2	6	320	1	2	2	6	362.22	6.58189	2.66	8.19	128.58	1	2	2	6	38.19	1	2	2	6	21.5	1	2	2	6	4196	1	2	2	6	9600	0.413462	0.77	39.6923	73.92
	1	3	2	6	450	1	3	2	6	350.58	6.70556	2.8	6.54	132.8	1	3	2	6	39.58	1	3	2	6	22.1	1	3	2	6	4217	1	3	2	6	9986	0.394231	1.04	39.3679	103.854
	1	1	3	1	230	1	1	3	1	174	5.71	0.97	5.68	111.3	1	1	3	1	31.29	1	1	3	1	14.9	1	1	3	1	2929	1	1	3	1	7986	0.682692	0.42	54.5198	33.5412
	1	2	3	1	360	1	2	3	1	182	3.26	1.02	4.32	118.9	1	2	3	1	24.8	1	2	3	1	14.3	1	2	3	1	2857	1	2	3	1	7200	0.721154	0.46	51.9231	33.12
	1	3	3	1	260	1	3	3	1	186	3.27	1.47	3.78	112.68	1	3	3	1	32.89	1	3	3	1	15	1	3	3	1	2929	1	3	3	1	7400	0.5	0.55	37	40.7
	1	1	3	2	510	1	1	3	2	259	6.63	1.37	7.09	124.34	1	1	3	2	31	1	1	3	2	17	1	1	3	2	3286	1	1	3	2	8757	0.567308	0.29	49.6791	25.3953
	1	2	3	2	430	1	2	3	2	260	4.09	1.87	4.9	125.02	1	2	3	2	26.26	1	2	3	2	17	1	2	3	2	3220	1	2	3	2	7600	0.413462	0.32	31.4231	24.32
	1	3	3	2	590	1	3	3	2	264	4.06	1.69	4.98	123.6	1	3	3	2	27.56	1	3	3	2	17	1	3	3	2	3209	1	3	3	2	8686	0.490385	0.41	42.5948	35.6126
	1	1	3	3	320	1	1	3	3	256	4.56	0.83	8.8	126.92	1	1	3	3	25.12	1	1	3	3	18	1	1	3	3	3557	1	1	3	3	8286	0.403846	0.55	33.4627	45.573
	1	2	3	3	390	1	2	3	3	234	3.07	0.92	5.28	126.56	1	2	3	3	31.75	1	2	3	3	16	1	2	3	3	3593	1	2	3	3	7129	0.490385	0.32	34.9595	22.8128
	1	3	3	3	330	1	3	3	3	231.42	3.01	0.79	6.03	137.62	1	3	3	3	29.69	1	3	3	3	19	1	3	3	3	3489	1	3	3	3	7900	0.538462	0.51	42.5385	40.29
	1	1	3	4	410	1	1	3	4	274	5.86	0.95	10.79	105.94	1	1	3	4	41.03	1	1	3	4	20	1	1	3	4	3367	1	1	3	4	7629	0.471154	0.29	35.9443	22.1241
	1	2	3	4	390	1	2	3	4	244	4.23	1.01	8.2	134.98	1	2	3	4	35.26	1	2	3	4	16	1	2	3	4	3188	1	2	3	4	5757	0.403846	0.41	23.2494	23.6037
	1	3	3	4	320	1	3	3	4	247.6	3.37	1.41	7.13	131.56	1	3	3	4	33.4	1	3	3	4	18	1	3	3	4	3329	1	3	3	4	6129	0.634615	0.72	38.8956	44.1288
	1	1	3	5	390	1	1	3	5	221.44	7.84	1.73	9.02722	131.7	1	1	3	5	35.56	1	1	3	5	20	1	1	3	5	3839	1	1	3	5	9029	0.490385	0.32	44.2768	28.8928
	1	2	3	5	310	1	2	3	5	222	4.71	2.43	9.29089	139.66	1	2	3	5	28.91	1	2	3	5	22	1	2	3	5	3829	1	2	3	5	8729	0.403846	0.41	35.2517	35.7889
	1	3	3	5	400	1	3	3	5	229	3.89	1.89	9.55456	135.52	1	3	3	5	27.44	1	3	3	5	22	1	3	3	5	3904	1	3	3	5	8414	0.375	0.45	31.5525	37.863
	1	1	3	6	360	1	1	3	6	267	8.38	1.07	8.97822	134.5	1	1	3	6	41.21	1	1	3	6	20.2	1	1	3	6	3734	1	1	3	6	8986	0.375	0.39	33.6975	35.0454
	1	2	3	6	310	1	2	3	6	240	5.9	2.29	9.24189	135.1	1	2	3	6	38.49	1	2	3	6	20.72	1	2	3	6	3722	1	2	3	6	7914	0.586538	0.42	46.4187	33.2388
	1	3	3	6	450	1	3	3	6	242.4	4.98	1.56	9.50556	130.56	1	3	3	6	39.81	1	3	3	6	21.1	1	3	3	6	3686	1	3	3	6	8771	0.538462	0.65	47.2285	57.0115
	2	1	1	1	240	2	1	1	1	237.58	2.3436	0.418803	2.7624	118	2	1	1	1	27.25	2	1	1	1	13	2	1	1	1	2271	2	1	1	1	6309	0.288462	0.32	18.199	20.1888
	2	2	1	1	210	2	2	1	1	246	1.4364	0.273504	1.7099	122.1	2	2	1	1	27.78	2	2	1	1	10.5	2	2	1	1	2314	2	2	1	1	6309	0.375	0.39	23.6588	24.6051
	2	3	1	1	270	2	3	1	1	213	2.4084	0.452991	2.86139	120.42	2	3	1	1	26.28	2	3	1	1	11.3	2	3	1	1	2343	2	3	1	1	6309	0.259615	0.49	16.3791	30.9141
	2	1	1	2	390	2	1	1	2	300	3.6936	0.666667	4.36027	118.78	2	1	1	2	28.83	2	1	1	2	17	2	1	1	2	2857	2	1	1	2	8014	0.307692	0.79	24.6585	63.3106
	2	2	1	2	260	2	2	1	2	306	2.3436	0.675214	3.01881	129.66	2	2	1	2	29.78	2	2	1	2	15	2	2	1	2	2979	2	2	1	2	8486	0.307692	0.36	26.1108	30.5496
	2	3	1	2	220	2	3	1	2	316	3.0996	0.837607	3.93721	129.82	2	3	1	2	27.14	2	3	1	2	17	2	3	1	2	3050	2	3	1	2	7786	0.346154	0.53	26.9515	41.2658
	2	1	1	3	320	2	1	1	3	330	4.7088	0.760684	5.46948	126.8	2	1	1	3	43.14	2	1	1	3	18	2	1	1	3	3414	2	1	1	3	8186	0.298077	0.66	24.4006	54.0276
	2	2	1	3	350	2	2	1	3	334	3.2508	0.820513	4.07131	125.2	2	2	1	3	33.44	2	2	1	3	19	2	2	1	3	3392	2	2	1	3	9200	0.375	0.43	34.5	39.56
	2	3	1	3	290	2	3	1	3	331.2	3.3588	0.905983	4.26478	128.38	2	3	1	3	28.83	2	3	1	3	17	2	3	1	3	3456	2	3	1	3	8314	0.240385	0.92	19.9856	76.4888
	2	1	1	4	410	2	1	1	4	336	4.7196	0.871795	5.59139	122.16	2	1	1	4	24.83	2	1	1	4	16.7	2	1	1	4	3241	2	1	1	4	8129	0.346154	0.39	28.1388	31.7031
	2	2	1	4	320	2	2	1	4	331	3.5964	0.811966	4.40837	129	2	2	1	4	27.68	2	2	1	4	17.5	2	2	1	4	3214	2	2	1	4	8486	0.307692	0.26	26.1108	22.0636
	2	3	1	4	290	2	3	1	4	330.9	3.5748	1.18803	4.76283	127.72	2	3	1	4	38.72	2	3	1	4	16.9	2	3	1	4	3187	2	3	1	4	8786	0.278846	0.25	24.4994	21.965
	2	1	1	5	260	2	1	1	5	314.58	3.8124	0.675214	4.48761	126.96	2	1	1	5	23.53	2	1	1	5	17.6	2	1	1	5	3914	2	1	1	5	9043	0.384615	0.41	34.7808	37.0763
	2	2	1	5	290	2	2	1	5	302	2.4516	0.57265	3.02425	119.76	2	2	1	5	39.39	2	2	1	5	18.2	2	2	1	5	3923	2	2	1	5	9443	0.298077	0.32	28.1474	30.2176
	2	3	1	5	250	2	3	1	5	318	2.3436	0.564103	2.9077	131.36	2	3	1	5	38.69	2	3	1	5	18.32	2	3	1	5	3971	2	3	1	5	9114	0.278846	0.39	25.414	35.5446
	2	1	1	6	410	2	1	1	6	320	5.2164	0.726496	5.9429	134.02	2	1	1	6	42.28	2	1	1	6	17.6	2	1	1	6	3643	2	1	1	6	8114	0.605769	0.29	49.1521	23.5306
	2	2	1	6	290	2	2	1	6	320	3.0564	0.692308	3.74871	127.58	2	2	1	6	47.67	2	2	1	6	17.4	2	2	1	6	3643	2	2	1	6	9314	0.365385	0.37	34.0319	34.4618
	2	3	1	6	390	2	3	1	6	325	3.2508	1.12821	4.37901	132.42	2	3	1	6	30.44	2	3	1	6	16.9	2	3	1	6	3714	2	3	1	6	9000	0.490385	0.32	44.1346	28.8
	2	1	2	1	320	2	1	2	1	211	5.3028	0.65812	6.99586	111.3	2	1	2	1	26.75	2	1	2	1	14	2	1	2	1	2964	2	1	2	1	7829	0.375	0.59	29.3588	46.1911
	2	2	2	1	210	2	2	2	1	228	3.6396	0.811966	4.39259	118.9	2	2	2	1	25.78	2	2	2	1	13	2	2	2	1	2559	2	2	2	1	8014	0.307692	0.65	24.6585	52.091
	2	3	2	1	360	2	3	2	1	220	3.24	0.666667	4.78801	122.68	2	3	2	1	31.03	2	3	2	1	13.5	2	3	2	1	2771	2	3	2	1	7700	0.403846	0.41	31.0962	31.57
	2	1	2	2	380	2	1	2	2	357	6.7392	0.726496	8.33134	124.34	2	1	2	2	35.36	2	1	2	2	19	2	1	2	2	3543	2	1	2	2	7114	0.298077	0.71	21.2052	50.5094
	2	2	2	2	220	2	2	2	2	342	4.158	0.897436	6.01549	125.02	2	2	2	2	40.56	2	2	2	2	19	2	2	2	2	3671	2	2	2	2	8614	0.471154	0.53	40.5852	45.6542
	2	3	2	2	260	2	3	2	2	356	4.0068	1.08547	5.82924	133.6	2	3	2	2	27.44	2	3	2	2	16	2	3	2	2	3457	2	3	2	2	9200	0.451923	0.73	41.5769	67.16
	2	1	2	3	220	2	1	2	3	348	8.046	1.15385	5.6342	126.92	2	1	2	3	39.69	2	1	2	3	23	2	1	2	3	4114	2	1	2	3	9271	0.403846	0.32	37.4406	29.6672
	2	2	2	3	260	2	2	2	3	256	4.3524	1.06838	4.10192	126.56	2	2	2	3	38.58	2	2	2	3	18	2	2	2	3	4100	2	2	2	3	9914	0.317308	0.29	31.4579	28.7506
	2	3	2	3	320	2	3	2	3	348	4.9032	1.2735	3.92601	137.62	2	3	2	3	25.78	2	3	2	3	17	2	3	2	3	3986	2	3	2	3	9857	0.394231	0.41	38.8593	40.4137
	2	1	2	4	450	2	1	2	4	334	9.3636	1.81197	7.14077	135.94	2	1	2	4	35.59	2	1	2	4	22	2	1	2	4	4114	2	1	2	4	8200	0.442308	0.32	36.2692	26.24
	2	2	2	4	320	2	2	2	4	324	6.48	1.88034	5.43165	134.98	2	2	2	4	37.69	2	2	2	4	20	2	2	2	4	3995	2	2	2	4	8786	0.413462	0.31	36.3267	27.2366
	2	3	2	4	230	2	3	2	4	321.4	5.1084	2.05128	4.84473	131.56	2	3	2	4	36.56	2	3	2	4	22	2	3	2	4	3919	2	3	2	4	8400	0.5	0.43	42	36.12
	2	1	2	5	610	2	1	2	5	338	6.5742	2.51282	9.94583	131.7	2	1	2	5	30.78	2	1	2	5	22.1	2	1	2	5	4969	2	1	2	5	9943	0.644231	0.41	64.0559	40.7663
	2	2	2	5	510	2	2	2	5	352.54	6.70776	2.63248	7.16372	139.66	2	2	2	5	29.58	2	2	2	5	22.5	2	2	2	5	5174	2	2	2	5	10671	0.576923	0.45	61.5635	48.0195
	2	3	2	5	420	2	3	2	5	342	6.84132	2.75214	5.81658	135.52	2	3	2	5	27.44	2	3	2	5	22.4	2	3	2	5	5100	2	3	2	5	10357	0.5	0.31	51.785	32.1067
	2	1	2	6	460	2	1	2	6	328	6.97488	2.15385	9.96493	144.5	2	1	2	6	35.9	2	1	2	6	19	2	1	2	6	4400	2	1	2	6	9500	0.307692	0.43	29.2308	40.85
	2	2	2	6	230	2	2	2	6	338	7.10844	2.2735	8.32926	145.1	2	2	2	6	37.99	2	2	2	6	23	2	2	2	6	4529	2	2	2	6	9732	0.490385	0.52	47.7242	50.6064
	2	3	2	6	290	2	3	2	6	336	7.242	2.39316	6.71173	140.56	2	3	2	6	35.9	2	3	2	6	22	2	3	2	6	4429	2	3	2	6	10029	0.538462	0.66	54.0023	66.1914
	2	1	3	1	220	2	1	3	1	188	6.1668	0.82906	5.96092	121.17	2	1	3	1	29.86	2	1	3	1	12	2	1	3	1	2529	2	1	3	1	6014	0.692308	0.61	41.6354	36.6854
	2	2	3	1	310	2	2	3	1	188	3.5208	0.871795	4.45157	128.22	2	2	3	1	24.56	2	2	3	1	12	2	2	3	1	2686	2	2	3	1	6500	0.663462	0.65	43.125	42.25
	2	3	3	1	400	2	3	3	1	189	3.5316	1.25641	3.90667	124.38	2	3	3	1	40.21	2	3	3	1	13.5	2	3	3	1	2786	2	3	3	1	5771	0.394231	0.37	22.7511	21.3527
	2	1	3	2	710	2	1	3	2	253.4	7.1604	1.17094	7.4657	130.68	2	1	3	2	40.49	2	1	3	2	16	2	1	3	2	3506	2	1	3	2	8271	0.471154	0.93	38.9691	76.9203
	2	2	3	2	410	2	2	3	2	250	4.4172	1.59829	5.05544	129.32	2	2	3	2	41.81	2	2	3	2	17	2	2	3	2	3480	2	2	3	2	8329	0.644231	0.79	53.658	65.7991
	2	3	3	2	620	2	3	3	2	254	4.3848	1.44444	5.09227	134.62	2	3	3	2	39.03	2	3	3	2	18	2	3	3	2	3514	2	3	3	2	7771	0.403846	0.85	31.3829	66.0535
	2	1	3	3	380	2	1	3	3	252	4.9248	0.709402	9.19985	130.22	2	1	3	3	31.26	2	1	3	3	18.2	2	1	3	3	3871	2	1	3	3	9357	0.298077	0.41	27.8911	38.3637
	2	2	3	3	450	2	2	3	3	258	3.3156	0.786325	5.42078	133.38	2	2	3	3	27.21	2	2	3	3	18.7	2	2	3	3	3829	2	2	3	3	8329	0.375	0.25	31.2338	20.8225
	2	3	3	3	560	2	3	3	3	261.42	3.2508	0.675214	6.1767	132.5	2	3	3	3	29.89	2	3	3	3	19.2	2	3	3	3	3871	2	3	3	3	8700	0.480769	0.29	41.8269	25.23
	2	1	3	4	330	2	1	3	4	250.28	6.3288	0.811966	11.1756	133.92	2	1	3	4	22.8	2	1	3	4	19	2	1	3	4	3774	2	1	3	4	8629	0.471154	1.02	40.6559	88.0158
	2	2	3	4	310	2	2	3	4	237	4.5684	0.863248	8.36034	128.58	2	2	3	4	28.89	2	2	3	4	15	2	2	3	4	3776	2	2	3	4	8186	0.403846	0.75	33.0588	61.395
	2	3	3	4	500	2	3	3	4	247.6	3.6396	1.20513	7.15968	132.8	2	3	3	4	30.1	2	3	3	4	20	2	3	3	4	3795	2	3	3	4	9000	0.394231	0.42	35.4808	37.8
	2	1	3	5	320	2	1	3	5	270	8.4672	1.47863	9.08702	155.24	2	1	3	5	38.26	2	1	3	5	21	2	1	3	5	4314	2	1	3	5	9814	0.442308	0.42	43.4081	41.2188
	2	2	3	5	330	2	2	3	5	258	5.0868	2.07692	9.34024	146.1	2	2	3	5	38.4	2	2	3	5	24	2	2	3	5	4371	2	2	3	5	9871	0.355769	0.45	35.118	44.4195
	2	3	3	5	210	2	3	3	5	269	4.2012	1.61538	9.59346	149.36	2	3	3	5	33.56	2	3	3	5	20	2	3	3	5	4386	2	3	3	5	9186	0.298077	0.43	27.3813	39.4998
	2	1	3	6	420	2	1	3	6	244	9.0504	0.91453	9.12873	148.66	2	1	3	6	29.91	2	1	3	6	20.6	2	1	3	6	4419	2	1	3	6	8914	0.346154	0.56	30.8562	49.9184
	2	2	3	6	400	2	2	3	6	250	6.372	1.95726	9.38194	142.2	2	2	3	6	29.44	2	2	3	6	20.3	2	2	3	6	4416	2	2	3	6	9000	0.567308	0.52	51.0577	46.8
	2	3	3	6	330	2	3	3	6	242.4	5.3784	1.33333	9.63516	135.98	2	3	3	6	27.12	2	3	3	6	21.23	2	3	3	6	4380	2	3	3	6	9186	0.394231	0.47	36.214	43.1742
	Y	R	C	M	X1	Y	R	C	M	X2	X3	X4	X5	X6					X7					X8					X9					X10	X11	X12	X13	X14
Rep	1,2, 3
Year	Y
First Year	1
second Year	2
Bacteria	B
non-inoculation	1
Azotobacter	2
Azospirillum	3
Organic amendment	M
Control	1
M	2
VM	3
VRM	4
VAM	5
VRAM	6

## Sheet: Sheet2
	Y	R	B	M	X1	X2	X3	X4	X5	X6	X7	X8	X9	X10	X11	X12	X13	X14
	Year	Rep	Bacteria	Organic amendment	SOIL BACTERIA accont	Microbial biomass–C	chlorophyll a	chlorophyll b	chlorophyll a+b	plant height	panicle length	No.tiller hill	grain yield	Biological yield	P leaf	K leaf	P uptake	K uptake
	1	1	1	1	170	230.9	2.17	0.49	2.66	108	25.28	12	2629	5986	0.375	0.76	22.4475	45.4936
	1	2	1	1	140	233	1.33	0.32	1.65	112.1	30.83	13	2757	5486	0.326923	0.33	17.935	18.1038
	1	3	1	1	200	226	2.23	0.53	2.76	110.42	27.78	12	2686	5971	0.259615	0.34	15.5016	20.3014
	1	1	1	2	200	328.4	3.42	0.78	4.2	128.78	44.72	15	2886	7014	0.298077	0.56	20.9071	39.2784
	1	2	1	2	320	320	2.17	0.79	2.96	129.66	38.28	15.7	2829	7000	0.259615	0.53	18.1731	37.1
	1	3	1	2	330	322	2.87	0.98	3.85	129.82	46.67	16	2857	7271	0.336538	0.42	24.4697	30.5382
	1	1	1	3	190	337.8	4.36	0.89	5.25	126.8	34.44	20	3114	7214	0.317308	0.52	22.8906	37.5128
	1	2	1	3	220	345	3.01	0.96	3.97	125.2	40.14	18	3071	7271	0.394231	0.41	28.6645	29.8111
	1	3	1	3	210	332	3.11	1.06	4.17	128.38	24.44	18	3100	7000	0.307692	0.6	21.5385	42
	1	1	1	4	290	331.7	4.37	1.02	5.39	122.16	38.19	18	2986	6586	0.567308	0.49	37.3629	32.2714
	1	2	1	4	320	328	3.33	0.95	4.28	129	34.86	19	2786	7329	0.394231	0.55	28.8932	40.3095
	1	3	1	4	190	330	3.31	1.39	4.7	127.72	48.06	17	2871	7457	0.403846	0.32	30.1148	23.8624
	1	1	1	5	410	356	3.53	0.79	4.32	126.96	32.83	18.9	3786	9443	0.278846	0.59	26.3314	55.7137
	1	2	1	5	400	358	2.27	0.67	2.94	119.76	31.25	19	3500	9114	0.307692	0.85	28.0431	77.469
	1	3	1	5	320	356.6	2.17	0.66	2.83	131.36	24.78	20	3500	9071	0.365385	0.95	33.144	86.1745
	1	1	1	6	190	358	4.83	0.85	5.68	134.02	21.14	18.7	3493	7129	0.394231	0.26	28.1047	18.5354
	1	2	1	6	370	334	2.83	0.81	3.64	127.58	28.53	19.2	3484	7657	0.442308	0.41	33.8675	31.3937
	1	3	1	6	320	343.4	3.01	1.32	4.33	132.42	38.89	19.11	3501	7686	0.375	0.42	28.8225	32.2812
	1	1	2	1	220	212	4.91	0.77	6.68	128.66	25.28	16.15	2717	6657	0.461538	0.25	30.7246	16.6425
	1	2	2	1	290	226	3.37	0.95	4.28	122.2	26.25	16.3	3030	7914	0.394231	0.29	31.1994	22.9506
	1	3	2	1	260	226	3	0.78	4.74	135.98	25.28	16.25	3210	8929	0.278846	0.41	24.8982	36.6089
	1	1	2	2	260	334	6.24	0.85	8	140.68	31.53	16.5	3517	8329	0.634615	0.52	52.8571	43.3108
	1	2	2	2	320	332	3.85	1.05	5.96	129.32	37.9	16.4	3419	8529	0.403846	0.91	34.444	77.6139
	1	3	2	2	350	337	3.71	1.27	5.75	134.62	30.28	17	3488	8286	0.442308	0.29	36.6496	24.0294
	1	1	2	3	310	330	7.45	1.35	5.39	130.22	40.59	20	3586	10229	0.471154	0.39	48.1943	39.8931
	1	2	2	3	290	338	4.03	1.25	3.99	133.38	27.08	21	3814	9386	0.394231	0.32	37.0025	30.0352
	1	3	2	3	360	330.8	4.54	1.49	3.8	132.5	38.69	19	3671	10057	0.413462	0.42	41.5818	42.2394
	1	1	2	4	210	352	8.67	2.12	6.81	141.17	37.56	17	3414	9100	0.384615	0.59	35	53.69
	1	2	2	4	320	348	6	2.2	5.24	138.22	34.26	18	3300	9186	0.384615	0.41	35.3308	37.6626
	1	3	2	4	370	348	4.73	2.4	4.78	134.38	30.21	19	3571	8857	0.442308	0.38	39.1752	33.6566
	1	1	2	5	420	358	6.08722	2.94	9.57	155.24	26.94	22.1	4659	10200	0.490385	0.51	50.0192	52.02
	1	2	2	5	490	340	6.21089	3.08	7.14	136.1	40.9	23	4686	11700	0.634615	0.27	74.25	31.59
	1	3	2	5	320	354	6.33456	3.22	5.78	139.36	38.99	22	4667	10600	0.403846	0.29	42.8077	30.74
	1	1	2	6	360	362	6.45822	2.52	9.45	133.92	26.94	21.3	4230	10586	0.403846	0.92	42.7512	97.3912
	1	2	2	6	320	362.22	6.58189	2.66	8.19	128.58	38.19	21.5	4196	9600	0.413462	0.77	39.6923	73.92
	1	3	2	6	450	350.58	6.70556	2.8	6.54	132.8	39.58	22.1	4217	9986	0.394231	1.04	39.3679	103.854
	1	1	3	1	230	174	5.71	0.97	5.68	111.3	31.29	14.9	2929	7986	0.682692	0.42	54.5198	33.5412
	1	2	3	1	360	182	3.26	1.02	4.32	118.9	24.8	14.3	2857	7200	0.721154	0.46	51.9231	33.12
	1	3	3	1	260	186	3.27	1.47	3.78	112.68	32.89	15	2929	7400	0.5	0.55	37	40.7
	1	1	3	2	510	259	6.63	1.37	7.09	124.34	31	17	3286	8757	0.567308	0.29	49.6791	25.3953
	1	2	3	2	430	260	4.09	1.87	4.9	125.02	26.26	17	3220	7600	0.413462	0.32	31.4231	24.32
	1	3	3	2	590	264	4.06	1.69	4.98	123.6	27.56	17	3209	8686	0.490385	0.41	42.5948	35.6126
	1	1	3	3	320	256	4.56	0.83	8.8	126.92	25.12	18	3557	8286	0.403846	0.55	33.4627	45.573
	1	2	3	3	390	234	3.07	0.92	5.28	126.56	31.75	16	3593	7129	0.490385	0.32	34.9595	22.8128
	1	3	3	3	330	231.42	3.01	0.79	6.03	137.62	29.69	19	3489	7900	0.538462	0.51	42.5385	40.29
	1	1	3	4	410	274	5.86	0.95	10.79	105.94	41.03	20	3367	7629	0.471154	0.29	35.9443	22.1241
	1	2	3	4	390	244	4.23	1.01	8.2	134.98	35.26	16	3188	5757	0.403846	0.41	23.2494	23.6037
	1	3	3	4	320	247.6	3.37	1.41	7.13	131.56	33.4	18	3329	6129	0.634615	0.72	38.8956	44.1288
	1	1	3	5	390	221.44	7.84	1.73	9.02722	131.7	35.56	20	3839	9029	0.490385	0.32	44.2768	28.8928
	1	2	3	5	310	222	4.71	2.43	9.29089	139.66	28.91	22	3829	8729	0.403846	0.41	35.2517	35.7889
	1	3	3	5	400	229	3.89	1.89	9.55456	135.52	27.44	22	3904	8414	0.375	0.45	31.5525	37.863
	1	1	3	6	360	267	8.38	1.07	8.97822	134.5	41.21	20.2	3734	8986	0.375	0.39	33.6975	35.0454
	1	2	3	6	310	240	5.9	2.29	9.24189	135.1	38.49	20.72	3722	7914	0.586538	0.42	46.4187	33.2388
	1	3	3	6	450	242.4	4.98	1.56	9.50556	130.56	39.81	21.1	3686	8771	0.538462	0.65	47.2285	57.0115
	2	1	1	1	240	237.58	2.3436	0.418803	2.7624	118	27.25	13	2271	6309	0.288462	0.32	18.199	20.1888
	2	2	1	1	210	246	1.4364	0.273504	1.7099	122.1	27.78	10.5	2314	6309	0.375	0.39	23.6588	24.6051
	2	3	1	1	270	213	2.4084	0.452991	2.86139	120.42	26.28	11.3	2343	6309	0.259615	0.49	16.3791	30.9141
	2	1	1	2	390	300	3.6936	0.666667	4.36027	118.78	28.83	17	2857	8014	0.307692	0.79	24.6585	63.3106
	2	2	1	2	260	306	2.3436	0.675214	3.01881	129.66	29.78	15	2979	8486	0.307692	0.36	26.1108	30.5496
	2	3	1	2	220	316	3.0996	0.837607	3.93721	129.82	27.14	17	3050	7786	0.346154	0.53	26.9515	41.2658
	2	1	1	3	320	330	4.7088	0.760684	5.46948	126.8	43.14	18	3414	8186	0.298077	0.66	24.4006	54.0276
	2	2	1	3	350	334	3.2508	0.820513	4.07131	125.2	33.44	19	3392	9200	0.375	0.43	34.5	39.56
	2	3	1	3	290	331.2	3.3588	0.905983	4.26478	128.38	28.83	17	3456	8314	0.240385	0.92	19.9856	76.4888
	2	1	1	4	410	336	4.7196	0.871795	5.59139	122.16	24.83	16.7	3241	8129	0.346154	0.39	28.1388	31.7031
	2	2	1	4	320	331	3.5964	0.811966	4.40837	129	27.68	17.5	3214	8486	0.307692	0.26	26.1108	22.0636
	2	3	1	4	290	330.9	3.5748	1.18803	4.76283	127.72	38.72	16.9	3187	8786	0.278846	0.25	24.4994	21.965
	2	1	1	5	260	314.58	3.8124	0.675214	4.48761	126.96	23.53	17.6	3914	9043	0.384615	0.41	34.7808	37.0763
	2	2	1	5	290	302	2.4516	0.57265	3.02425	119.76	39.39	18.2	3923	9443	0.298077	0.32	28.1474	30.2176
	2	3	1	5	250	318	2.3436	0.564103	2.9077	131.36	38.69	18.32	3971	9114	0.278846	0.39	25.414	35.5446
	2	1	1	6	410	320	5.2164	0.726496	5.9429	134.02	42.28	17.6	3643	8114	0.605769	0.29	49.1521	23.5306
	2	2	1	6	290	320	3.0564	0.692308	3.74871	127.58	47.67	17.4	3643	9314	0.365385	0.37	34.0319	34.4618
	2	3	1	6	390	325	3.2508	1.12821	4.37901	132.42	30.44	16.9	3714	9000	0.490385	0.32	44.1346	28.8
	2	1	2	1	320	211	5.3028	0.65812	6.99586	111.3	26.75	14	2964	7829	0.375	0.59	29.3588	46.1911
	2	2	2	1	210	228	3.6396	0.811966	4.39259	118.9	25.78	13	2559	8014	0.307692	0.65	24.6585	52.091
	2	3	2	1	360	220	3.24	0.666667	4.78801	122.68	31.03	13.5	2771	7700	0.403846	0.41	31.0962	31.57
	2	1	2	2	380	357	6.7392	0.726496	8.33134	124.34	35.36	19	3543	7114	0.298077	0.71	21.2052	50.5094
	2	2	2	2	220	342	4.158	0.897436	6.01549	125.02	40.56	19	3671	8614	0.471154	0.53	40.5852	45.6542
	2	3	2	2	260	356	4.0068	1.08547	5.82924	133.6	27.44	16	3457	9200	0.451923	0.73	41.5769	67.16
	2	1	2	3	220	348	8.046	1.15385	5.6342	126.92	39.69	23	4114	9271	0.403846	0.32	37.4406	29.6672
	2	2	2	3	260	256	4.3524	1.06838	4.10192	126.56	38.58	18	4100	9914	0.317308	0.29	31.4579	28.7506
	2	3	2	3	320	348	4.9032	1.2735	3.92601	137.62	25.78	17	3986	9857	0.394231	0.41	38.8593	40.4137
	2	1	2	4	450	334	9.3636	1.81197	7.14077	135.94	35.59	22	4114	8200	0.442308	0.32	36.2692	26.24
	2	2	2	4	320	324	6.48	1.88034	5.43165	134.98	37.69	20	3995	8786	0.413462	0.31	36.3267	27.2366
	2	3	2	4	230	321.4	5.1084	2.05128	4.84473	131.56	36.56	22	3919	8400	0.5	0.43	42	36.12
	2	1	2	5	610	338	6.5742	2.51282	9.94583	131.7	30.78	22.1	4969	9943	0.644231	0.41	64.0559	40.7663
	2	2	2	5	510	352.54	6.70776	2.63248	7.16372	139.66	29.58	22.5	5174	10671	0.576923	0.45	61.5635	48.0195
	2	3	2	5	420	342	6.84132	2.75214	5.81658	135.52	27.44	22.4	5100	10357	0.5	0.31	51.785	32.1067
	2	1	2	6	460	328	6.97488	2.15385	9.96493	144.5	35.9	19	4400	9500	0.307692	0.43	29.2308	40.85
	2	2	2	6	230	338	7.10844	2.2735	8.32926	145.1	37.99	23	4529	9732	0.490385	0.52	47.7242	50.6064
	2	3	2	6	290	336	7.242	2.39316	6.71173	140.56	35.9	22	4429	10029	0.538462	0.66	54.0023	66.1914
	2	1	3	1	220	188	6.1668	0.82906	5.96092	121.17	29.86	12	2529	6014	0.692308	0.61	41.6354	36.6854
	2	2	3	1	310	188	3.5208	0.871795	4.45157	128.22	24.56	12	2686	6500	0.663462	0.65	43.125	42.25
	2	3	3	1	400	189	3.5316	1.25641	3.90667	124.38	40.21	13.5	2786	5771	0.394231	0.37	22.7511	21.3527
	2	1	3	2	710	253.4	7.1604	1.17094	7.4657	130.68	40.49	16	3506	8271	0.471154	0.93	38.9691	76.9203
	2	2	3	2	410	250	4.4172	1.59829	5.05544	129.32	41.81	17	3480	8329	0.644231	0.79	53.658	65.7991
	2	3	3	2	620	254	4.3848	1.44444	5.09227	134.62	39.03	18	3514	7771	0.403846	0.85	31.3829	66.0535
	2	1	3	3	380	252	4.9248	0.709402	9.19985	130.22	31.26	18.2	3871	9357	0.298077	0.41	27.8911	38.3637
	2	2	3	3	450	258	3.3156	0.786325	5.42078	133.38	27.21	18.7	3829	8329	0.375	0.25	31.2338	20.8225
	2	3	3	3	560	261.42	3.2508	0.675214	6.1767	132.5	29.89	19.2	3871	8700	0.480769	0.29	41.8269	25.23
	2	1	3	4	330	250.28	6.3288	0.811966	11.1756	133.92	22.8	19	3774	8629	0.471154	1.02	40.6559	88.0158
	2	2	3	4	310	237	4.5684	0.863248	8.36034	128.58	28.89	15	3776	8186	0.403846	0.75	33.0588	61.395
	2	3	3	4	500	247.6	3.6396	1.20513	7.15968	132.8	30.1	20	3795	9000	0.394231	0.42	35.4808	37.8
	2	1	3	5	320	270	8.4672	1.47863	9.08702	155.24	38.26	21	4314	9814	0.442308	0.42	43.4081	41.2188
	2	2	3	5	330	258	5.0868	2.07692	9.34024	146.1	38.4	24	4371	9871	0.355769	0.45	35.118	44.4195
	2	3	3	5	210	269	4.2012	1.61538	9.59346	149.36	33.56	20	4386	9186	0.298077	0.43	27.3813	39.4998
	2	1	3	6	420	244	9.0504	0.91453	9.12873	148.66	29.91	20.6	4419	8914	0.346154	0.56	30.8562	49.9184
	2	2	3	6	400	250	6.372	1.95726	9.38194	142.2	29.44	20.3	4416	9000	0.567308	0.52	51.0577	46.8
	2	3	3	6	330	242.4	5.3784	1.33333	9.63516	135.98	27.12	21.23	4380	9186	0.394231	0.47	36.214	43.1742
	Y	R	C	M	X1	X2	X3	X4	X5	X6	X7	X8	X9	X10	X11	X12	X13	X14

## Sheet: urease
											AZOSPRILLIUM							AZOTOBACTER									CONTROL
									T1	T2	T3	T4					T1	T2	T3	T4					T1	T2	T3	T4
								Control	140	190	244	230				Control	142.5	160	190	164.5				Control	141	160	200	175
								M	141	245	267.3	254.5				M	141.2	180	232.7	206.8				M	136	155	220	212
								VM	182	261.2	273.4	261.6				VM	142.3	210	222.8	197.1				VM	148.2	180	210	198
								VRM	146	240	272.1	250				VRM	143.5	240	241	201.6				VRM	136.5	171.7	187.9	195
								VAM	185	280	293	267				VAM	161.3	282	287	212				VAM	140	180	230	221
								VRAM	158	260	263.3	240				VRAM	142.5	210	240	218.4				VRAM	135.5	187	224.5	217
									T1	T2	T3	T4					T1	T2	T3	T4					T1	T2	T3	T4
								Control	150	203	227.8	198.7				Control	141.5	165	221.4	184.1				Control	135	153.2	198.5	188.5
								M	141.5	225	254.3	247				M	143	212	230	196.2				M	137	159	197	186.2
								VM	146.5	237.4	256.3	250				VM	142	232	247	239				VM	141	190	205	197
								VRM	154	265	260	240				VRM	144	217	234	220				VRM	148	164	194.2	174
								VAM	181	286.5	295	270				VAM	161.5	243	280	238				VAM	138	170	236	237
								VRAM	150	215	261	246.1				VRAM	153	237	249	241.2				VRAM	142	207.3	230	230
								0	0	0	0	0
								0	0	0	0	0
								0	0	0	0	0
								0	0	0	0	0
								0	0	0	0	0
								0	0	0	0	0

## Sheet: Soil Eh
							A	O	C
							May	June	July	August	September
						Control	210	-65	-190	-188	12
						M	192	-82	-210	-215	-100
						VM	95	-150	-251	-279	-71
						VRM	182	-120	-231	-230	-80
						VAM	22	-250	-290	-251	-200
						VRAM	90	-237	-280	-260	-210
							VM	182	-120	-239	-269	-80
							May	June	July	August	September
						Control	323.2	-54	-144	-149.04	-34
						M	158.4	-59.04	-151.2	-154.8	-72
						VM	68.04	-108.4	-172.08	-183.68	-57.6
						VRM	131.4	-67.7	-180.72	-190.33	-51.12
						VAM	15.8	-195.6	-220.6	-217.72	-154
						VRAM	64.84	-147.84	-208.8	-210.3	-144.2
							38	4	9	6	2
							May	June	July	August	September
						Control	206.592	-74	-140	-161	-9
						M	160	-96	-163	-159	-77
						VM	92	-110	-194	-215	-64
						VRM	120	-117	-179	-212	-60
						VAM	40	-181	-293.696	-258	-210
						VRAM	92	-204	-274	-221.6	-171.53
							May	June	July	August	September		May	June	July	August	September
						M0	210	-75	-200	-207	-90	No-inoculum	126.94	-108.48	-176.4	-177.72	-90.12
						M1	220	-82	-210	-215	-100	Azotobacter	136.5	-150.667	-245	-246.833	-125.167
						M2	182	-120	-239	-269	-80	Azospirillum	131.72	-129.573	-210.7	-212.277	-107.643
						M3	95	-150	-251	-279	-71
						M4	90	-230	-280	-251	-200
						M5	22	-247	-290	-260	-210
							136.5	-150.667	-245	-246.833	-125.167
						M0	323.2	-54	-144	-149.04	-64.8
						M1	158.4	-59.04	-151.2	-154.8	-72
						M2	131.04	-86.4	-172.08	-193.68	-57.6
						M3	68.4	-108	-180.72	-200.88	-51.12
						M4	64.8	-165.6	-201.6	-180.72	-144
						M5	15.84	-177.84	-208.8	-187.2	-151.2
							126.947	-108.48	-176.4	-177.72	-90.12
						M0	206.592	-74	-150	-161	-74
						M1	120	-96	-163	-159	-77
						M2	162	-110	-184	-215	-64
						M3	95	-117	-188.563	-212	-60
						M4	90	-181	-273.696	-228	-122.64
						M5	42	-204	-291.328	-258.432	-160
							119.265	-130.333	-208.431	-205.572	-92.94
														May	June	July	August	September
													No-inoculum	126.94	-108.48	-176.4	-177.72	-90.12
													Azotobacter	136.5	-150.667	-245	-246.833	-125.167
													Azospirillum	131.72	-129.573	-220.7	-212.277	-107.643
											May	June	July	August	September
										M0	210	-75	-200	-207	-90
										M1	220	-82	-210	-215	-100
										M2	182	-120	-239	-269	-80
										M3	95	-150	-251	-279	-71
										M4	90	-230	-280	-251	-200
										M5	22	-247	-290	-260	-210
											136.5	-150.667	-245	-246.833	-125.167
										M0	323.2	-54	-144	-149.04	-64.8
										M1	158.4	-59.04	-151.2	-154.8	-72
										M2	131.04	-86.4	-172.08	-193.68	-57.6
										M3	68.4	-108	-180.72	-200.88	-51.12
										M4	64.8	-165.6	-201.6	-180.72	-144
										M5	15.84	-177.84	-208.8	-187.2	-151.2
											126.947	-108.48	-176.4	-177.72	-90.12
										M0	206.592	-74	-150	-161	-74
										M1	120	-96	-163	-159	-77
										M2	162	-110	-184	-215	-64
										M3	95	-117	-188.563	-212	-60
										M4	90	-181	-273.696	-228	-122.64
										M5	42	-204	-291.328	-258.432	-160
											127.986	-129.801	-210.019	-210.265	-103.232
